# Supplementary material for: An improved stable Ti/Sb–SnO2 electrode with high performance in electrochemical oxidation processes
Source: Royal Society of Chemistry journal article supplement (doi:10.1039/c4ra01990c), 2014-01-01
Supplement: c4ra01990c1.pdf [file c4ra01990c1.pdf]

## Supporting Information

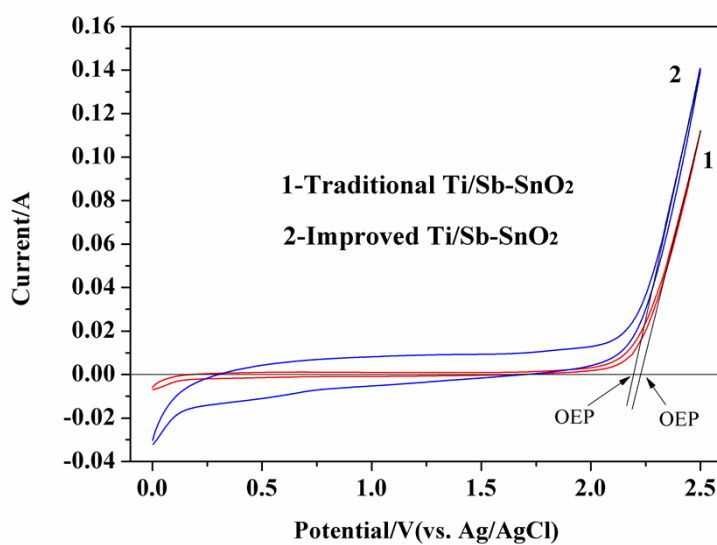

Fig. S1 Illustration of OEP determination using tangent method

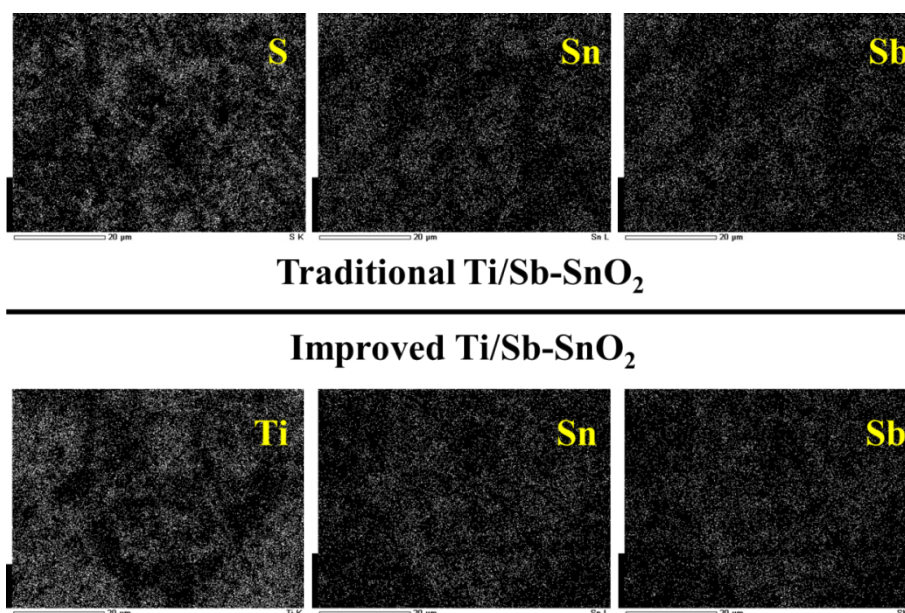

Fig. S2 Element distribution of deactivated conventional Ti/Sb-SnO<sub>2</sub> and deactivated improved

Ti/Sb-SnO<sub>2</sub> after the accelerated lifetime test (room temperature, 0.5 M H<sub>2</sub>SO<sub>4</sub>, anodic current

density 200 mA cm<sup>-2</sup>, electrode area of 2 cm<sup>2</sup>)
